# Supplementary material
Source: publisher figshare collection journal article supplement (https://aacr.figshare.com/articles/dataset/_/23853110)
Supplement: Supplementary file 1 [file 41846549]

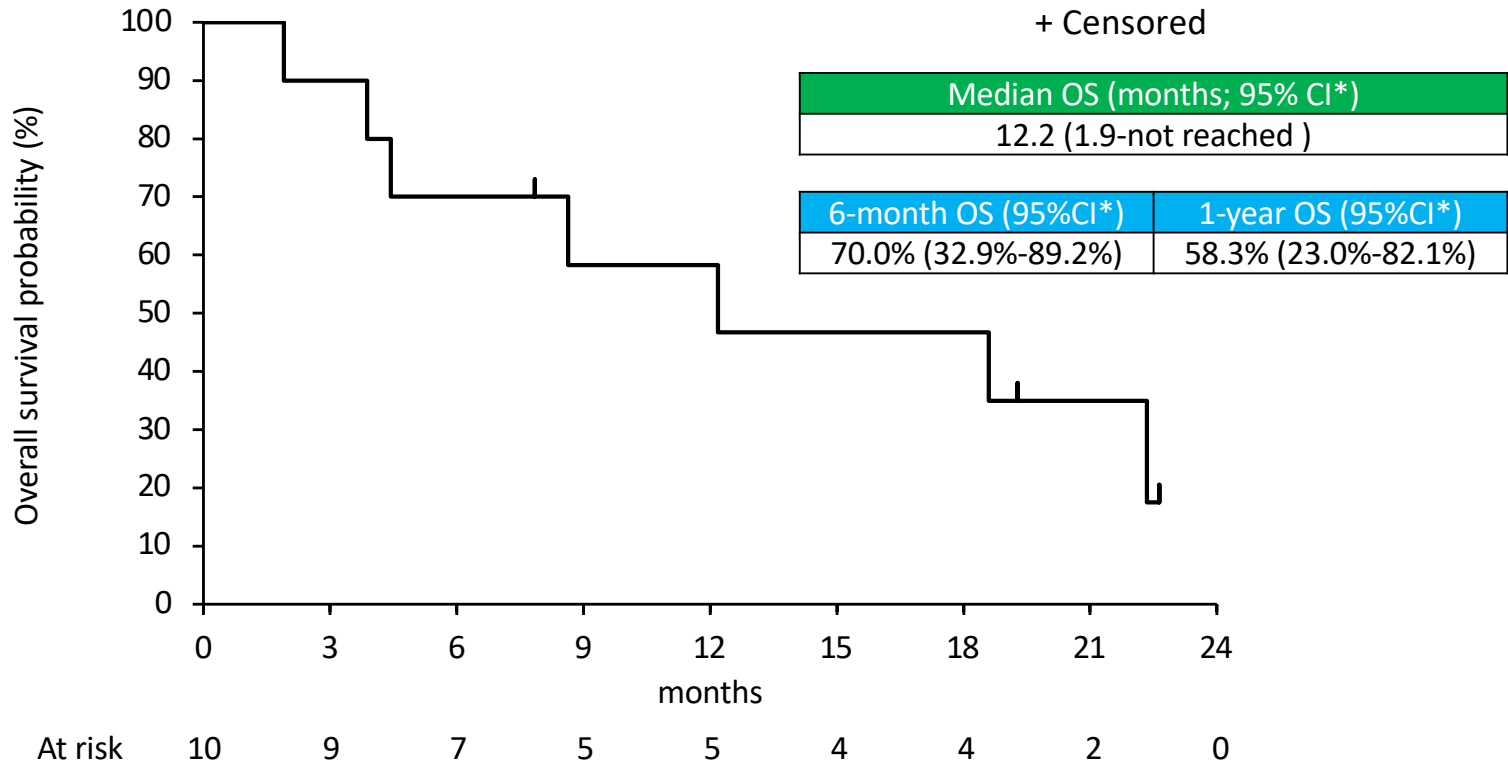

\*Confidence interval by the method of Brookmeyer and Crowley

## **Supplementary Fig. S4B. Overall survival.**

Abbreviations: OS, overall survival; CI, confidence interval
